# Supplementary material for: The synthesis of a Cu(ii) Schiff base complex using a bidentate N2O2 donor ligand: crystal structure, photophysical properties, and antibacterial activities
Source: Royal Society of Chemistry journal article supplement (doi:10.1039/c9ra07298e), 2019-01-01
Supplement: c9ra07298e1.pdf [file c9ra07298e1.pdf]

## Supporting information

### **Synthesis of Cu(II) Schiff base complex using a bidentate N<sub>2</sub>O<sub>2</sub> donor ligand: Crystal structure, photophysical properties and antibacterial activities**

**Yaning Guo\*, Xiaobing Hu, Xinli Zhang , Xiaohua Pu and Yue Wang**

College of Chemistry and Chemical Engineering, Baoji University of Arts and Sciences, Shaanxi  
Province Key Laboratory of Phytochemistry, Baoji Shaanxi 721013 People's Republic of China

[ggyn1997@163.com](mailto:ggyn1997@163.com) ( Y. N. Guo)

## Figure Captions

Fig. S1  $^1\text{H}$  NMR spectrum of HL in  $\text{DMSO-}d_6$

Fig. S2  $^{13}\text{C}$  NMR spectrum of HL in  $\text{DMSO-}d_6$

Fig. S3 (a) The two-dimensional structure of HL viewed along the [100] direction; (b) The three-dimensional structure of HL formed by  $\text{C-H}\cdots\text{Cl}$ ,  $\text{C-H}\cdots\pi$  and  $\text{C-H}\cdots\text{O}$  hydrogen bonds. Dotted lines represent the weak interactions.

Fig. S4 The FTIR spectra of HL and  $\text{Cu(II)}$  complex

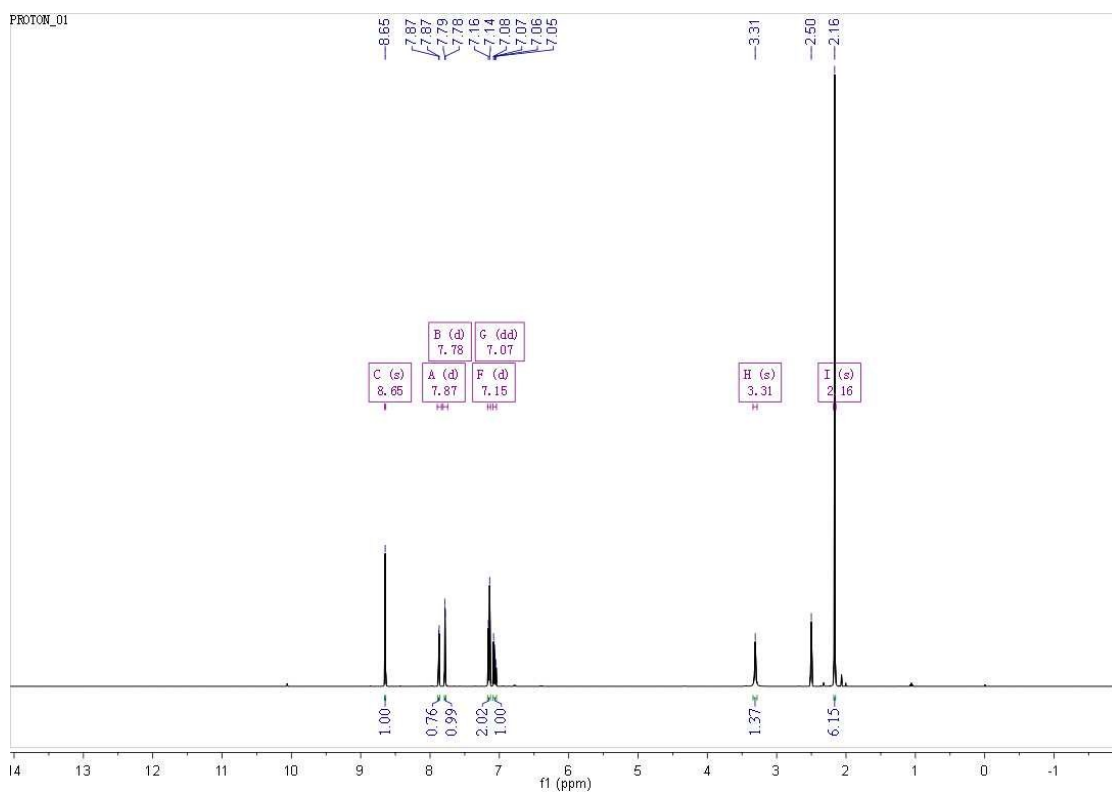

Fig. S1  $^1\text{H}$  NMR spectrum of HL in  $\text{DMSO-}d_6$

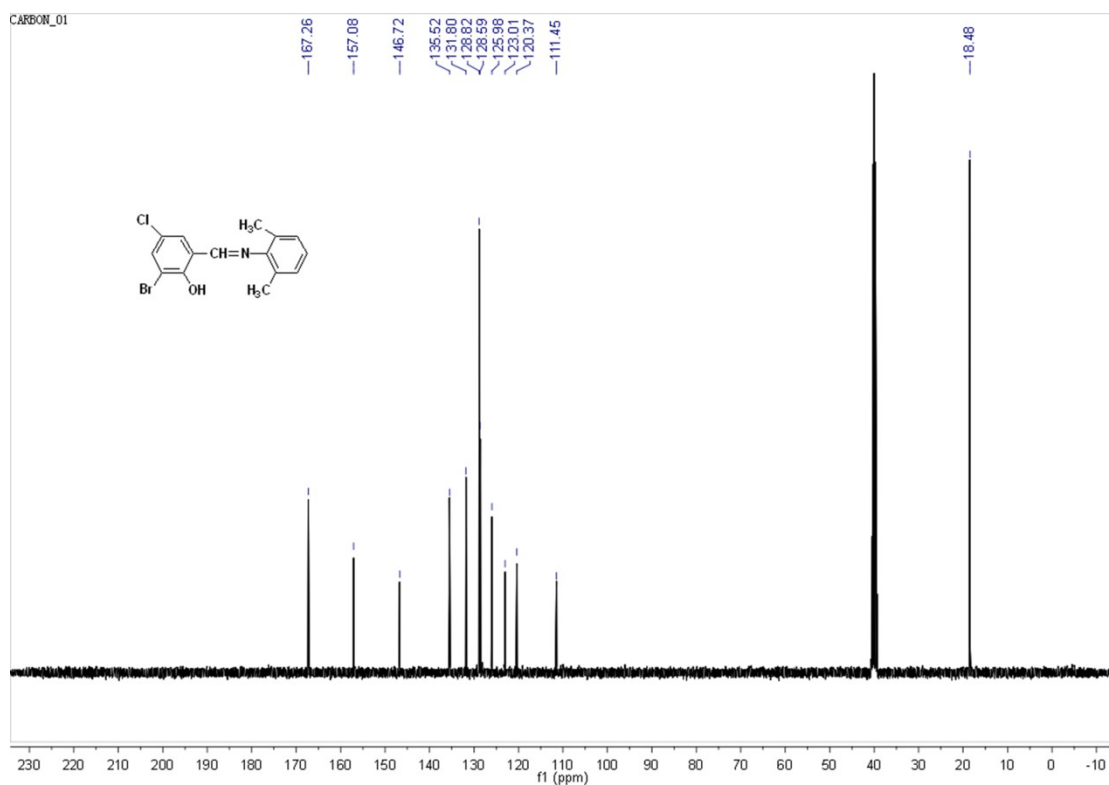

Fig. S2  $^{13}\text{C}$  NMR spectrum of HL in  $\text{DMSO-}d_6$

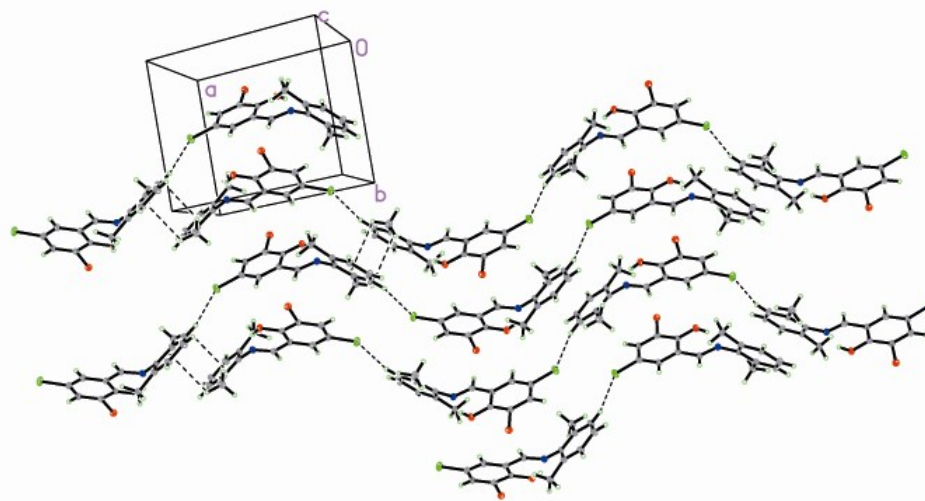

(a)

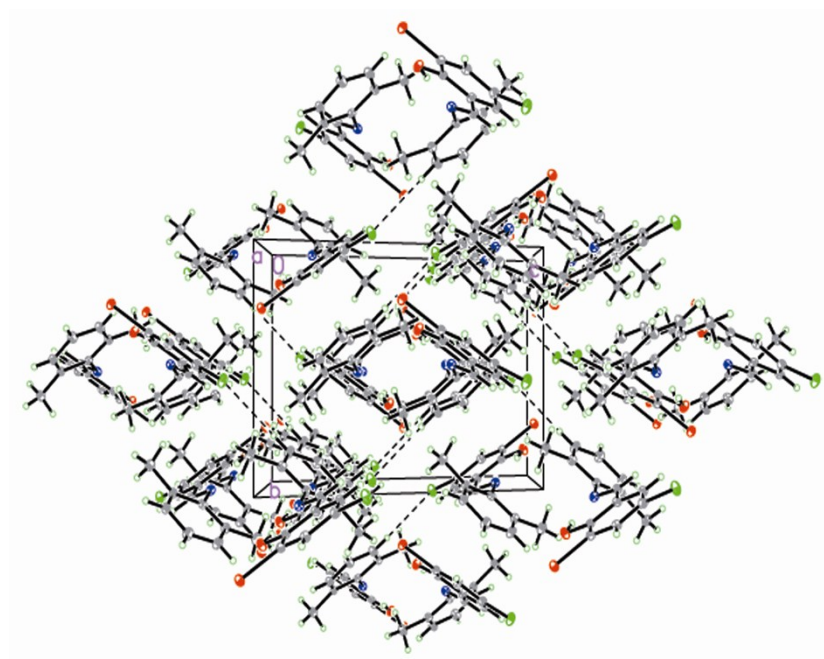

(b)

**Fig. S3** (a) The two-dimensional structure of HL viewed along the [100] direction; (b) The three-dimensional structure of HL formed by C-H---Cl, C-H--- $\pi$  and C-H---O hydrogen bonds. Dotted lines represent the weak interactions.

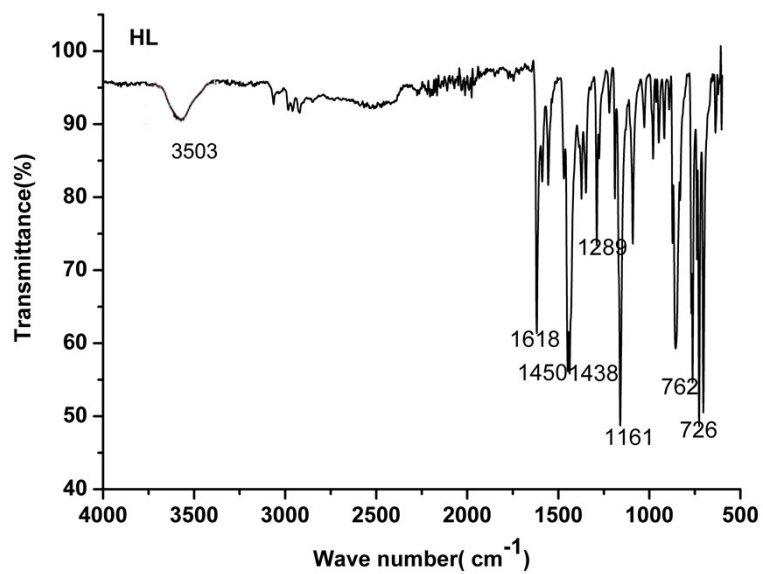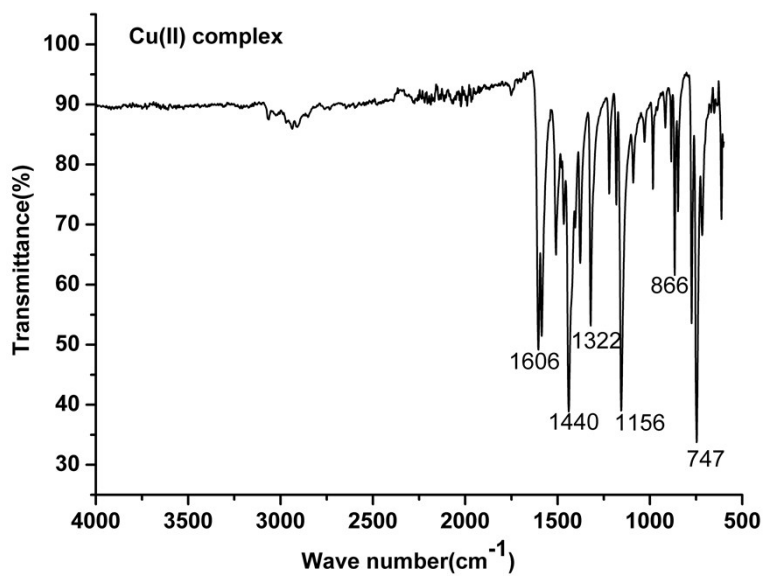

Fig. S4 The FTIR spectra of HL and Cu(II) complex

**Table captions:**

Table S1 Selected bond lengths (nm) and bond angles (°) for HL and Cu(II) complex

Table S2 Parameters of hydrogen bonds and halogen-halogen interaction for HL and Cu(II) complex

Table S1 Selected bond lengths (nm) and bond angles (°) for HL and Cu(II) complex

| Bonds                                      | <i>d</i>    | Bonds                        | <i>d</i>    | Bonds                       | <i>d</i>    |
|--------------------------------------------|-------------|------------------------------|-------------|-----------------------------|-------------|
| HL                                         |             |                              |             |                             |             |
| Br(1)-C(2)                                 | 0.1890(2)   | Cl(1)-C(4)                   | 0.1729(2)   | O(1)-C(1)                   | 0.1343(3)   |
| N(1)-C(7)                                  | 0.1276(3)   | N(1)-C(8)                    | 0.1437(3)   | C(6)-C(7)                   | 0.1457(3)   |
| O(1)-H(10)                                 | 0.093(3)    | C(8)-C(9)                    | 0.1407(3)   | C(7)-H(7)                   | 0.09500     |
| Cu(II) complex                             |             |                              |             |                             |             |
| Cu(1)-O(1) <sup>#1</sup>                   | 0.18841(12) | Cu(1)-O(1)                   | 0.18841(12) | Cu(1)-N(1)                  | 0.19772(15) |
| Cu(1)-N(1) <sup>#1</sup>                   | 0.19772(15) | Br(1)-C(3)                   | 0.18899(18) | Cl(1)-C(5)                  | 0.17495(18) |
| O(1)-C(2)                                  | 0.1295(2)   | N(1)-C(7)                    | 0.1292(2)   | N(1)-C(8)                   | 0.1446(2)   |
| C(7)-H(7)                                  | 0.09500     | C(1)-C(7)                    | 0.1441(2)   | C(5)-C(6)                   | 0.1368(3)   |
| Angle                                      | $\omega$    | Angle                        | $\omega$    | Angle                       | $\omega$    |
| HL                                         |             |                              |             |                             |             |
| C(1)O(1)H(10)                              | 103.1(19)   | C(7)N(1)C(8)                 | 118.7(2)    | O(1)-C(1)-C(2)              | 119.9(2)    |
| O(1)-C(1)-C(6)                             | 121.9(2)    | C(3)-C(2)-Br(1)              | 119.69(17)  | C(1)-C(2)-Br(1)             | 118.62(16)  |
| C(1)C(6)C(7)                               | 120.3(2)    | N(1)C(7)C(6)                 | 122.3(2)    | C(5)C(4)Cl(1)               | 119.58(18)  |
| C(3)C(4)Cl(1)                              | 119.20(18)  | C(6)C(1)C(2)                 | 118.2(2)    | C(2)C(3)C(4)                | 118.8(2)    |
| Cu(II) complex                             |             |                              |             |                             |             |
| O(1) <sup>#1</sup> Cu(1)O(1)               | 156.81(8)   | O(1) <sup>#1</sup> Cu(1)N(1) | 92.75(6)    | O(1)Cu(1)N(1)               | 93.13(6)    |
| O(1) <sup>#1</sup> Cu(1)N(1) <sup>#1</sup> | 93.13(6)    | O(1)Cu(1)N(1) <sup>#1</sup>  | 92.75(6)    | N(1)Cu(1)N(1) <sup>#1</sup> | 150.41(9)   |
| C(2)O(1)Cu(1)                              | 127.53(12)  | C(7)N(1)C(8)                 | 116.08(15)  | C(7)-N(1)-Cu(1)             | 123.05(12)  |
| C(8)-N(1)-Cu(1)                            | 120.41(11)  | C(6)-C(1)-C(7)               | 116.40(16)  | O(1)-C(2)-C(1)              | 124.45(15)  |
| C(4)-C(3)-Br(1)                            | 119.32(13)  | C(2)-C(3)-Br(1)              | 117.66(13)  | C(6)-C(5)-Cl(1)             | 119.55(15)  |
| C(4)-C(5)-Cl(1)                            | 119.21(14)  | N(1)-C(7)-C(1)               | 126.26(16)  | C(9)-C(8)-N(1)              | 118.05(16)  |

Symmetry transformations used to generate equivalent atoms: <sup>#1</sup> -x+1,y,-z+1/2

Table S2 Parameters of hydrogen bonds and halogen-halogen interaction for HL and Cu(II) complex

| Compound       | D—H...A                            | <i>d</i> (D—H) | <i>d</i> (H...A) | <i>d</i> (D...A) | $\angle$ (DHA) |
|----------------|------------------------------------|----------------|------------------|------------------|----------------|
| HL             | C(12)-H(12)...Cl(1) <sup>i</sup>   | 0.0950         | 0.2890           | 0.3803           | 161.4          |
|                | C(14)-H(14c)...O(1) <sup>ii</sup>  | 0.0980         | 0.2706           | 0.3145           | 107.7          |
|                | C(15)-H(15)...Cg                   | 0.0980         | 0.3201           | 0.3615           | 107.3          |
| Cu(II) complex | C(14)-H(14C)---Cl(1) <sup>#2</sup> | 0.1749         | 0.2911           | 0.3776           | 168.5          |
|                | C(10)-H(10)...Cg <sup>#3</sup>     | 0.0950         | 0.2826           | 0.3470           | 125.4          |
